# Supplementary material for: Continuous wet chemical synthesis of Mo(C,N,O)x as anode materials for Li-ion batteries
Source: Royal Society of Chemistry journal article supplement (doi:10.1039/d3ta03340f), 2023-01-01
Supplement: d3ta03340f1.pdf [file d3ta03340f1.pdf]

## Supporting Information

### Continuous Wet Chemical Synthesis of $\text{Mo}(\text{C,N,O})_x$ as Anode Materials for Li-Ion Batteries

Mana Abdirahman Mohamed<sup>[a]†</sup> (0000-0003-0708-7623),

Stefanie Arnold<sup>[b,c]†</sup> (0000-0002-4954-4610),

Dr. Oliver Janka<sup>[a]</sup> (0000-0002-9480-3888),

Dr. Antje Quade<sup>[e]</sup> (0000-0003-0814-4319),

Jörg Schmauch<sup>[f]</sup>,

Prof. Dr. Volker Presser<sup>[b,c,d]\*</sup> (0000-0003-2181-0590),

Prof. Dr. Guido Kickelbick<sup>[a]\*</sup> (0000-0001-6813-9269)

[a] Saarland University, Inorganic Solid-State Chemistry, Campus C4 1, 66123 Saarbrücken, Germany

[b] INM - Leibniz Institute for New Materials, 66123 Saarbrücken, Germany

[c] Saarland University, Department of Materials Science and Engineering, 66123 Saarbrücken, Germany

[d] Saarene - Saarland Center for Energy Materials and Sustainability, 66123 Saarbrücken, Germany

[e] Leibniz Institute for Plasma Science and Technology, Felix-Hausdorff-Straße 2, 17489 Greifswald, Germany

[f] Physics Department, Saarland University, Campus D2.2, 66123 Saarbrücken, Germany

+ equal contributions

\* Corresponding authors:

GK: [guido.kickelbick@uni-saarland.de](mailto:guido.kickelbick@uni-saarland.de)

VP: [volker.presser@leibniz-inm.de](mailto:volker.presser@leibniz-inm.de)



**Figure S1:** Crystal structures of a) orthorhombic Mo<sub>2</sub>C,<sup>1,2</sup> b) cubic MoC<sub>0.67</sub>,<sup>3</sup> and c) hexagonal MoC<sub>0.49</sub> Mo atoms are depicted in blue, C atoms in black.



**Figure S2:** General reaction scheme, first step precursor precipitation followed by pyrolysis reaction.

**Table S1:** Elemental analysis of PPD/molybdate precursors after the pyrolysis.

|                                     | Carbon<br>/ mass% | Hydrogen<br>/ mass% | Nitrogen<br>/ mass% |
|-------------------------------------|-------------------|---------------------|---------------------|
| <b>Ideal Mo<sub>2</sub>C</b>        | 5.89              | 0                   | 0                   |
| <b>Ideal MoOC</b>                   | 9.69              | 0                   | 0                   |
| <b>Ideal Mo<sub>2</sub>N</b>        | 0                 | 0                   | 6.80                |
| PPD/molybdate <b>(9:1) (600°C)</b>  | 20.85             | 0.24                | 0.74                |
| PPD/molybdate <b>(10:1) (600°C)</b> | 21.45             | 0.22                | 0.59                |
| PPD/molybdate <b>(1:1) (750°C)</b>  | 0.38              | 0                   | 2.56                |
| PPD/molybdate <b>(2:1) (750°C)</b>  | 2.01              | 0                   | 0.22                |
| PPD/molybdate <b>(5:1) (750°C)</b>  | 3.19              | 0                   | 0.14                |
| PPD/molybdate <b>(9:1) (750°C)</b>  | 22.75             | 0                   | 0.24                |
| PPD/molybdate <b>(10:1) (750°C)</b> | 20.02             | 0                   | 0.24                |
| PPD/molybdate <b>(15:1) (750°C)</b> | 22.62             | 0                   | 0.30                |
| PPD/molybdate <b>(18:1) (750°C)</b> | 23.57             | 0                   | 0.20                |
| PPD/molybdate <b>(20:1) (750°C)</b> | 23.15             | 0                   | 0.19                |
| PPD/molybdate <b>(25:1) (750°C)</b> | 22.86             | 0                   | 0.23                |
| PPD/molybdate <b>(30:1) (750°C)</b> | 22.59             | 0                   | 0.23                |



**Figure S3:** Electrochemical performance of pyrolyzed PPD/molybdate hybrid materials. Cyclic voltammograms at different scan rates and potential range between 0.01 V and 3.00 V vs. Li<sup>+</sup>/Li for (a) 1:1 and (b) 10:1 pyrolyzed at 750 °C as well as (c) 9:1 and (d) 10:1 synthesized at 600 °C.



**Figure S4:** Cyclic voltammograms at different scan rates and kinetic fitting to calculate b-values for (a-b) PPD/molybdate (1:1) (750°C); (c-d) PPD/molybdate (10:1) (750°C); (e-f) PPD/molybdate (9:1) (600°C); (g-h) PPD/molybdate (10:1) (600°C).

### Supporting References

- (1) Parthé, E.; Sadogopan, V. The Structure of Dimolybdenum Carbide by Neutron Diffraction Technique. *Acta Crystallogr.* **1963**, *16*, 202–205. <https://doi.org/10.1107/s0365110x63000487>.
- (2) Norlund Christensen, A. A Neutron Diffraction Investigation on a Crystal of Alpha-Mo<sub>2</sub>C. *Acta Chem. Scand. Ser. A* **1977**, *31*, 509–511.
- (3) 'Rudy, E. .; 'Brukl, C. E. .; 'Windisch, S. . Constitution of Niobium (Columbium)-Molybdenum-Carbon Alloys. *Trans. Metall. Soc. AIME* **1967**, *239*, 1796–1808.
